# Supplementary material
Source: PubMed Central journal article supplement (PMC3870284)
Supplement: NIHMS526074-supplement-2.pdf [file NIHMS526074-supplement-2.pdf]

A

CHEK1 Expression in DErrico Gastric  
Gastric Intestinal Type Adenocarcinoma vs. Normal  
Expression Gene Rank: 184 (in top 1%)  
Reporter: 205393\_s\_at 205394\_at t T est: 8.767

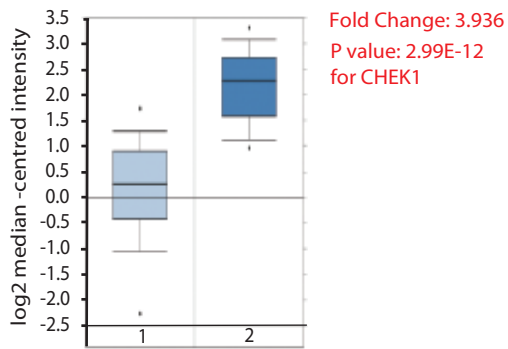

Legend- DErrico Gastric  
1. Gastric Mucosa (31)  
2. Gastric Intestinal Type Adenocarcinoma (26)

B

Chk1 vs CIP2A  
Tumor Ovarian - Bowtell Study of 285 samples  
Transform\_2 log R = 0.627, P = 1.4 e-32

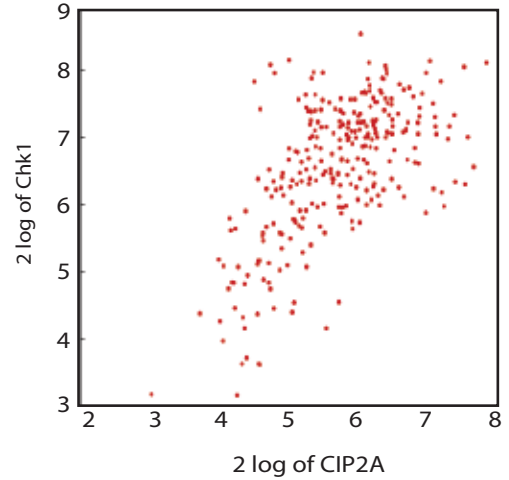

C

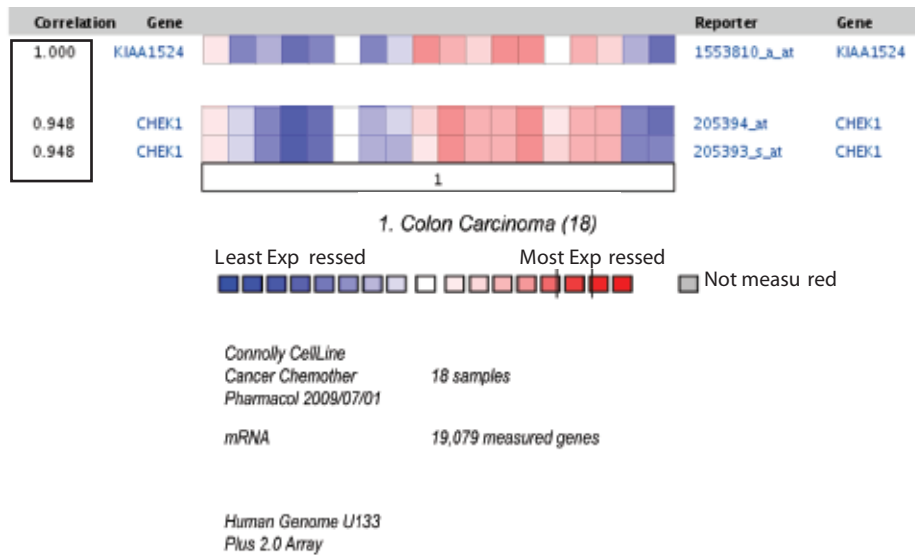

D

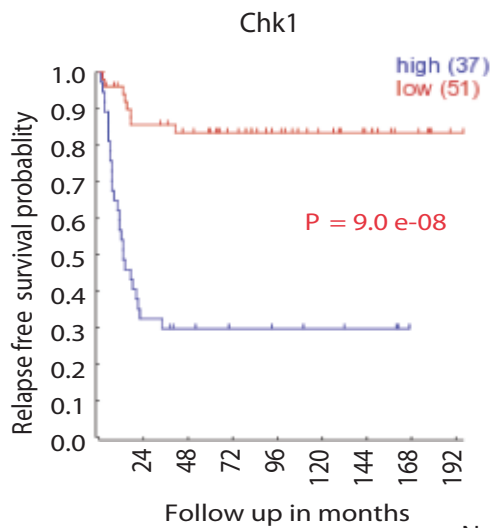

E

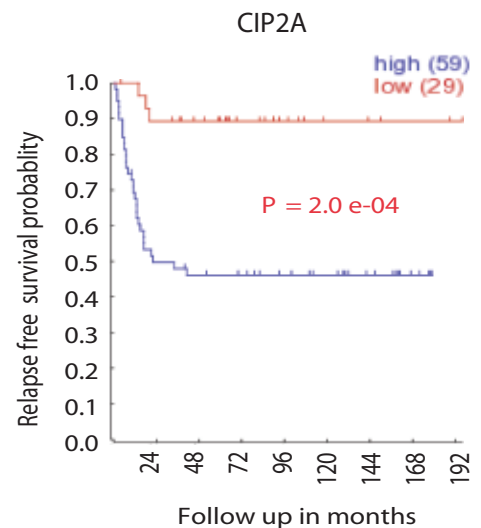

Figure S1
