# Supplementary material
Source: PubMed Central journal article supplement (PMC3870284)
Supplement: NIHMS526074-supplement-7.pdf [file NIHMS526074-supplement-7.pdf]

Supplementary Table S1. Co-relation between Chk1 and c-MYC nuclear staining in gastric cancer

| p = 0.05*             | Chk1  |                         | c-Myc nuclear |          | Total  |
|-----------------------|-------|-------------------------|---------------|----------|--------|
|                       |       |                         | negative      | positive |        |
|                       | 0     | Count                   | 16            | 1        | 17     |
|                       |       | % within Chk1 0, 1, 2-3 | 94.1%         | 5.9%     | 100.0% |
|                       | 1     | Count                   | 87            | 7        | 94     |
|                       |       | % within Chk1 0, 1, 2-3 | 92.6%         | 7.4%     | 100.0% |
|                       | 2-3   | Count                   | 34            | 9        | 43     |
|                       |       | % within Chk1 0, 1, 2-3 | 79.1%         | 20.9%    | 100.0% |
| * Fisher's exact test | Total | Count                   | 137           | 17       | 154    |
|                       |       | % within Chk1 0, 1, 2-3 | 89.0%         | 11.0%    | 100.0% |
