# Supplementary material
Source: PubMed Central journal article supplement (PMC3870284)
Supplement: NIHMS526074-supplement-8.pdf [file NIHMS526074-supplement-8.pdf]

**Supplementary Table S2.**

**List of genes which expression significantly correlates  
with Chk1 and CIP2A expression in human neuroblastoma**

| <b>Gene<br/>Name</b> | <b>Spearman Correlation Coefficient</b> |                |                   |                |
|----------------------|-----------------------------------------|----------------|-------------------|----------------|
|                      | <b>With Chk1</b>                        | <b>p-value</b> | <b>With CIP2A</b> | <b>p-value</b> |
| MND1                 | 0.8757                                  | 6.2830E-29     | 0.6795            | 3.3798E-13     |
| DLGAP5               | 0.8724                                  | 1.7795E-28     | 0.7398            | 1.8272E-16     |
| CENPK                | 0.8633                                  | 2.8161E-27     | 0.7683            | 2.4005E-18     |
| CCNB2                | 0.8592                                  | 9.1705E-27     | 0.7490            | 4.8113E-17     |
| BUB1B                | 0.8579                                  | 1.3514E-26     | 0.7137            | 5.9788E-15     |
| CCNB1                | 0.8564                                  | 2.0612E-26     | 0.7627            | 5.8938E-18     |
| KIAA0101             | 0.8522                                  | 6.4577E-26     | 0.7436            | 1.0630E-16     |
| NCAPG                | 0.8522                                  | 6.5038E-26     | 0.7007            | 2.9775E-14     |
| CENPA                | 0.8427                                  | 7.5218E-25     | 0.7126            | 6.8444E-15     |
| ECT2                 | 0.8390                                  | 1.9194E-24     | 0.7992            | 1.0322E-20     |
| RNASEH2A             | 0.8329                                  | 8.1326E-24     | 0.6722            | 7.4458E-13     |
| C11orf82             | 0.8324                                  | 9.1792E-24     | 0.6598            | 2.7179E-12     |
| MLF1IP               | 0.8319                                  | 1.0256E-23     | 0.6825            | 2.4238E-13     |
| CDCA7                | 0.8256                                  | 4.3853E-23     | 0.6452            | 1.1587E-11     |
| TRIP13               | 0.8256                                  | 4.3924E-23     | 0.6484            | 8.4560E-12     |
| DSCC1                | 0.8242                                  | 5.9519E-23     | 0.7118            | 7.6506E-15     |
| MAD2L1               | 0.8241                                  | 6.0744E-23     | 0.7076            | 1.2845E-14     |
| DEPDC1B              | 0.8240                                  | 6.2379E-23     | 0.7265            | 1.1349E-15     |
| CENPE                | 0.8239                                  | 6.3507E-23     | 0.7352            | 3.4933E-16     |
| RRM2                 | 0.8226                                  | 8.5725E-23     | 0.7030            | 2.2438E-14     |
| CENPN                | 0.8215                                  | 1.0849E-22     | 0.6765            | 4.7141E-13     |
| CEP152               | 0.8165                                  | 3.1828E-22     | 0.6372            | 2.4729E-11     |
| CDC45                | 0.8160                                  | 3.5381E-22     | 0.6619            | 2.1985E-12     |
| POLE2                | 0.8159                                  | 3.6018E-22     | 0.6919            | 8.3414E-14     |
| CHEK2                | 0.8150                                  | 4.3698E-22     | 0.6162            | 1.6506E-10     |
| SKA3                 | 0.8140                                  | 5.4045E-22     | 0.6595            | 2.8046E-12     |
| DBF4                 | 0.8111                                  | 9.7236E-22     | 0.7269            | 1.0700E-15     |
| SUV39H2              | 0.8097                                  | 1.3093E-21     | 0.6905            | 9.8348E-14     |
| EXO1                 | 0.8074                                  | 2.0684E-21     | 0.6477            | 9.0814E-12     |
| FANCD2               | 0.8074                                  | 2.0755E-21     | 0.6399            | 1.9307E-11     |
| KIF15                | 0.8041                                  | 3.9773E-21     | 0.7236            | 1.6771E-15     |
| BUB1                 | 0.8029                                  | 5.0361E-21     | 0.7020            | 2.5389E-14     |
| ORC6                 | 0.8028                                  | 5.1395E-21     | 0.7313            | 5.9168E-16     |
| SPC25                | 0.8014                                  | 6.7959E-21     | 0.7593            | 1.0069E-17     |
| TYMS                 | 0.8009                                  | 7.4638E-21     | 0.6756            | 5.1472E-13     |
| HJURP                | 0.8004                                  | 8.2119E-21     | 0.7152            | 4.9281E-15     |
| CDCA2                | 0.8003                                  | 8.3951E-21     | 0.7249            | 1.4060E-15     |
| C4orf46              | 0.8001                                  | 8.6318E-21     | 0.6232            | 8.9040E-11     |
| PPIL5                | 0.8000                                  | 8.8450E-21     | 0.6769            | 4.4722E-13     |
| GINS2                | 0.7966                                  | 1.7031E-20     | 0.7150            | 5.0815E-15     |
| KIF20A               | 0.7965                                  | 1.7461E-20     | 0.7217            | 2.1286E-15     |
| FANCI                | 0.7963                                  | 1.8050E-20     | 0.6635            | 1.8548E-12     |
| CENPF                | 0.7961                                  | 1.8535E-20     | 0.7015            | 2.6951E-14     |
| CDKN3                | 0.7957                                  | 2.0101E-20     | 0.7497            | 4.3548E-17     |
| FAM83D               | 0.7940                                  | 2.7525E-20     | 0.6859            | 1.6656E-13     |

|           |        |            |        |            |
|-----------|--------|------------|--------|------------|
| C14orf145 | 0.7922 | 3.8482E-20 | 0.6430 | 1.4318E-11 |
| NUSAP1    | 0.7901 | 5.7102E-20 | 0.7341 | 4.0470E-16 |
| PLK4      | 0.7894 | 6.4074E-20 | 0.7506 | 3.7771E-17 |
| PCNA      | 0.7891 | 6.8484E-20 | 0.7257 | 1.2639E-15 |
| NEIL3     | 0.7886 | 7.4788E-20 | 0.6766 | 4.6394E-13 |
| DHFR      | 0.7880 | 8.2862E-20 | 0.7285 | 8.7094E-16 |
| KIF11     | 0.7879 | 8.4640E-20 | 0.7541 | 2.2209E-17 |
| NCAPH     | 0.7873 | 9.3629E-20 | 0.7320 | 5.4249E-16 |
| FAM54A    | 0.7871 | 9.6632E-20 | 0.6607 | 2.4947E-12 |
| C15orf23  | 0.7865 | 1.0807E-19 | 0.6928 | 7.5278E-14 |
| CENPO     | 0.7852 | 1.3657E-19 | 0.6526 | 5.6132E-12 |
| GINS1     | 0.7803 | 3.2321E-19 | 0.7122 | 7.2153E-15 |
| PTTG1     | 0.7794 | 3.7670E-19 | 0.7697 | 1.9170E-18 |
| ASPM      | 0.7759 | 6.8659E-19 | 0.7124 | 7.0445E-15 |
| MELK      | 0.7750 | 7.9125E-19 | 0.6952 | 5.6636E-14 |
| KIF4A     | 0.7744 | 8.8532E-19 | 0.7067 | 1.4386E-14 |
| OIP5      | 0.7739 | 9.5898E-19 | 0.7524 | 2.8818E-17 |
| CENPM     | 0.7736 | 1.0058E-18 | 0.6176 | 1.4628E-10 |
| MCM6      | 0.7700 | 1.8216E-18 | 0.6339 | 3.3850E-11 |
| RFC4      | 0.7699 | 1.8594E-18 | 0.7255 | 1.2893E-15 |
| CDK1      | 0.7694 | 2.0237E-18 | 0.7764 | 6.2453E-19 |
| KIF18A    | 0.7688 | 2.2301E-18 | 0.7717 | 1.3730E-18 |
| DDX39     | 0.7687 | 2.2474E-18 | 0.6125 | 2.2794E-10 |
| TTK       | 0.7683 | 2.3889E-18 | 0.7787 | 4.2641E-19 |
| MCM10     | 0.7680 | 2.5245E-18 | 0.6200 | 1.1845E-10 |
| PBK       | 0.7670 | 2.9594E-18 | 0.7837 | 1.7691E-19 |
| SRSF7     | 0.7667 | 3.1381E-18 | 0.6497 | 7.4880E-12 |
| GMNN      | 0.7627 | 5.8742E-18 | 0.7351 | 3.5087E-16 |
| UBE2C     | 0.7626 | 5.9898E-18 | 0.7010 | 2.8665E-14 |
| CENPH     | 0.7612 | 7.5264E-18 | 0.6662 | 1.4074E-12 |
| MASTL     | 0.7606 | 8.2018E-18 | 0.6659 | 1.4574E-12 |
| RAD51     | 0.7597 | 9.4377E-18 | 0.7104 | 9.0902E-15 |
| TRIM59    | 0.7582 | 1.1996E-17 | 0.7393 | 1.9463E-16 |
| NDC80     | 0.7564 | 1.5656E-17 | 0.7053 | 1.7027E-14 |
| AURKA     | 0.7562 | 1.6242E-17 | 0.7500 | 4.1253E-17 |
| CEP55     | 0.7521 | 3.0169E-17 | 0.7542 | 2.1998E-17 |
| MCM2      | 0.7494 | 4.5526E-17 | 0.6291 | 5.2594E-11 |
| SKP2      | 0.7491 | 4.6974E-17 | 0.6067 | 3.7128E-10 |
| CCNA2     | 0.7491 | 4.7036E-17 | 0.7564 | 1.5664E-17 |
| KIF23     | 0.7487 | 5.0242E-17 | 0.7802 | 3.2711E-19 |
| DTL       | 0.7481 | 5.4627E-17 | 0.6518 | 6.0804E-12 |
| RFC3      | 0.7478 | 5.7312E-17 | 0.7169 | 4.0011E-15 |
| RTKN2     | 0.7476 | 5.8684E-17 | 0.6543 | 4.7301E-12 |
| RRM1      | 0.7459 | 7.5892E-17 | 0.7123 | 7.1517E-15 |
| TPX2      | 0.7452 | 8.3742E-17 | 0.6720 | 7.6613E-13 |
| ARHGAP11A | 0.7445 | 9.2760E-17 | 0.6566 | 3.7563E-12 |
| CENPW     | 0.7426 | 1.2184E-16 | 0.7351 | 3.5001E-16 |
| MYBL2     | 0.7423 | 1.2703E-16 | 0.6590 | 2.9427E-12 |
| CDC25C    | 0.7415 | 1.4280E-16 | 0.6722 | 7.4973E-13 |
| SMC4      | 0.7403 | 1.7007E-16 | 0.8278 | 2.6852E-23 |

|           |         |            |         |            |
|-----------|---------|------------|---------|------------|
| NUF2      | 0.7401  | 1.7321E-16 | 0.7497  | 4.2982E-17 |
| UHRF1     | 0.7379  | 2.3762E-16 | 0.6529  | 5.4409E-12 |
| BIRC5     | 0.7351  | 3.5157E-16 | 0.6825  | 2.4286E-13 |
| AURKB     | 0.7345  | 3.8412E-16 | 0.7027  | 2.3255E-14 |
| FEN1      | 0.7319  | 5.5021E-16 | 0.6757  | 5.1032E-13 |
| BLM       | 0.7306  | 6.4978E-16 | 0.6016  | 5.7136E-10 |
| POLA2     | 0.7253  | 1.3308E-15 | 0.6277  | 5.9282E-11 |
| CKS2      | 0.7246  | 1.4601E-15 | 0.6355  | 2.9097E-11 |
| CDCA5     | 0.7229  | 1.8394E-15 | 0.6746  | 5.7681E-13 |
| UBE2T     | 0.7197  | 2.7905E-15 | 0.6920  | 8.2599E-14 |
| ATAD2     | 0.7152  | 4.9725E-15 | 0.7151  | 5.0192E-15 |
| TMPO      | 0.7151  | 5.0361E-15 | 0.6875  | 1.3885E-13 |
| POLQ      | 0.7117  | 7.6869E-15 | 0.6672  | 1.2663E-12 |
| SHCBP1    | 0.7113  | 8.1133E-15 | 0.6326  | 3.8071E-11 |
| FOXM1     | 0.7104  | 9.1208E-15 | 0.6494  | 7.6758E-12 |
| FAM64A    | 0.7055  | 1.6676E-14 | 0.6461  | 1.0629E-11 |
| RAD54L    | 0.7032  | 2.2035E-14 | 0.6138  | 2.0351E-10 |
| TOM1L2    | -0.7029 | 2.2871E-14 | -0.6022 | 5.4150E-10 |
| WDR76     | 0.7020  | 2.5284E-14 | 0.6645  | 1.6865E-12 |
| HMMR      | 0.7002  | 3.1362E-14 | 0.6283  | 5.6328E-11 |
| FBXO5     | 0.6986  | 3.8085E-14 | 0.7114  | 7.9839E-15 |
| ERCC6L    | 0.6985  | 3.8503E-14 | 0.6991  | 3.6098E-14 |
| TMEM194A  | 0.6961  | 5.1041E-14 | 0.6105  | 2.6991E-10 |
| TOP2A     | 0.6936  | 6.8659E-14 | 0.6735  | 6.4794E-13 |
| HMGB2     | 0.6928  | 7.5717E-14 | 0.7284  | 8.7650E-16 |
| SPC24     | 0.6891  | 1.1576E-13 | 0.6617  | 2.2407E-12 |
| RAD51AP1  | 0.6866  | 1.5245E-13 | 0.7856  | 1.2773E-19 |
| C14orf106 | 0.6864  | 1.5645E-13 | 0.6149  | 1.8556E-10 |
| DNA2      | 0.6851  | 1.8114E-13 | 0.6146  | 1.9010E-10 |
| RFC5      | 0.6793  | 3.4408E-13 | 0.7125  | 6.9410E-15 |
| C12orf48  | 0.6763  | 4.7844E-13 | 0.6888  | 1.1891E-13 |
| CKS1B     | 0.6758  | 5.0434E-13 | 0.6818  | 2.6289E-13 |
| GTSE1     | 0.6749  | 5.5723E-13 | 0.6369  | 2.5502E-11 |
| KIF14     | 0.6734  | 6.5286E-13 | 0.6791  | 3.5245E-13 |
| PTTG3P    | 0.6734  | 6.5450E-13 | 0.6870  | 1.4585E-13 |
| BRCA1     | 0.6729  | 6.9443E-13 | 0.6054  | 4.1359E-10 |
| ANLN      | 0.6713  | 8.1742E-13 | 0.7214  | 2.2306E-15 |
| TRA2B     | 0.6703  | 9.1176E-13 | 0.6436  | 1.3549E-11 |
| FAM174B   | -0.6687 | 1.0862E-12 | -0.6034 | 4.8940E-10 |
| KIF18B    | 0.6682  | 1.1357E-12 | 0.6403  | 1.8426E-11 |
| UNG       | 0.6662  | 1.3992E-12 | 0.6018  | 5.6061E-10 |
| SRSF1     | 0.6661  | 1.4213E-12 | 0.6223  | 9.6172E-11 |
| RACGAP1   | 0.6659  | 1.4437E-12 | 0.6444  | 1.2524E-11 |
| ZWINT     | 0.6659  | 1.4450E-12 | 0.6675  | 1.2222E-12 |
| E2F1      | 0.6659  | 1.4556E-12 | 0.6269  | 6.3860E-11 |
| HMGB3     | 0.6656  | 1.4926E-12 | 0.6496  | 7.5618E-12 |
| ACTL6A    | 0.6641  | 1.7444E-12 | 0.6554  | 4.2392E-12 |
| CDC6      | 0.6624  | 2.0955E-12 | 0.6187  | 1.3253E-10 |
| ATP2B4    | -0.6604 | 2.5484E-12 | -0.6329 | 3.6871E-11 |
| DEPDC1    | 0.6598  | 2.7187E-12 | 0.7181  | 3.4382E-15 |

|         |         |            |         |            |
|---------|---------|------------|---------|------------|
| VRK1    | 0.6595  | 2.8172E-12 | 0.6523  | 5.7588E-12 |
| SGOL1   | 0.6581  | 3.2413E-12 | 0.6237  | 8.5505E-11 |
| CDC25A  | 0.6576  | 3.4016E-12 | 0.6235  | 8.6562E-11 |
| MCM8    | 0.6572  | 3.5279E-12 | 0.6282  | 5.6735E-11 |
| SGOL2   | 0.6554  | 4.2492E-12 | 0.7023  | 2.4395E-14 |
| ZNF443  | 0.6545  | 4.6626E-12 | 0.6170  | 1.5374E-10 |
| POC1A   | 0.6532  | 5.3147E-12 | 0.6215  | 1.0372E-10 |
| BRIP1   | 0.6433  | 1.3929E-11 | 0.7037  | 2.0779E-14 |
| ZNF492  | 0.6391  | 2.0829E-11 | 0.6076  | 3.4388E-10 |
| H2AFZ   | 0.6390  | 2.0919E-11 | 0.6221  | 9.7971E-11 |
| DNAJC9  | 0.6329  | 3.6993E-11 | 0.6040  | 4.6608E-10 |
| EME1    | 0.6327  | 3.7670E-11 | 0.6179  | 1.4253E-10 |
| KIF22   | 0.6321  | 3.9786E-11 | 0.6109  | 2.6029E-10 |
| KIF2C   | 0.6313  | 4.2712E-11 | 0.6639  | 1.7917E-12 |
| PRC1    | 0.6302  | 4.7520E-11 | 0.6221  | 9.7995E-11 |
| IGF2BP3 | 0.6226  | 9.3967E-11 | 0.6788  | 3.6705E-13 |
| ZBTB4   | -0.6198 | 1.2021E-10 | -0.6281 | 5.7236E-11 |
| E2F7    | 0.6168  | 1.5680E-10 | 0.6531  | 5.3341E-12 |
| NEK2    | 0.6131  | 2.1641E-10 | 0.7101  | 9.4711E-15 |
| TOPBP1  | 0.6107  | 2.6615E-10 | 0.7453  | 8.3100E-17 |
| ZNF367  | 0.6069  | 3.6438E-10 | 0.7068  | 1.4176E-14 |
| E2F8    | 0.6068  | 3.6985E-10 | 0.6223  | 9.6554E-11 |
| ZWILCH  | 0.6035  | 4.8786E-10 | 0.6619  | 2.1866E-12 |
