# Supplementary material
Source: PubMed Central journal article supplement (PMC3870284)

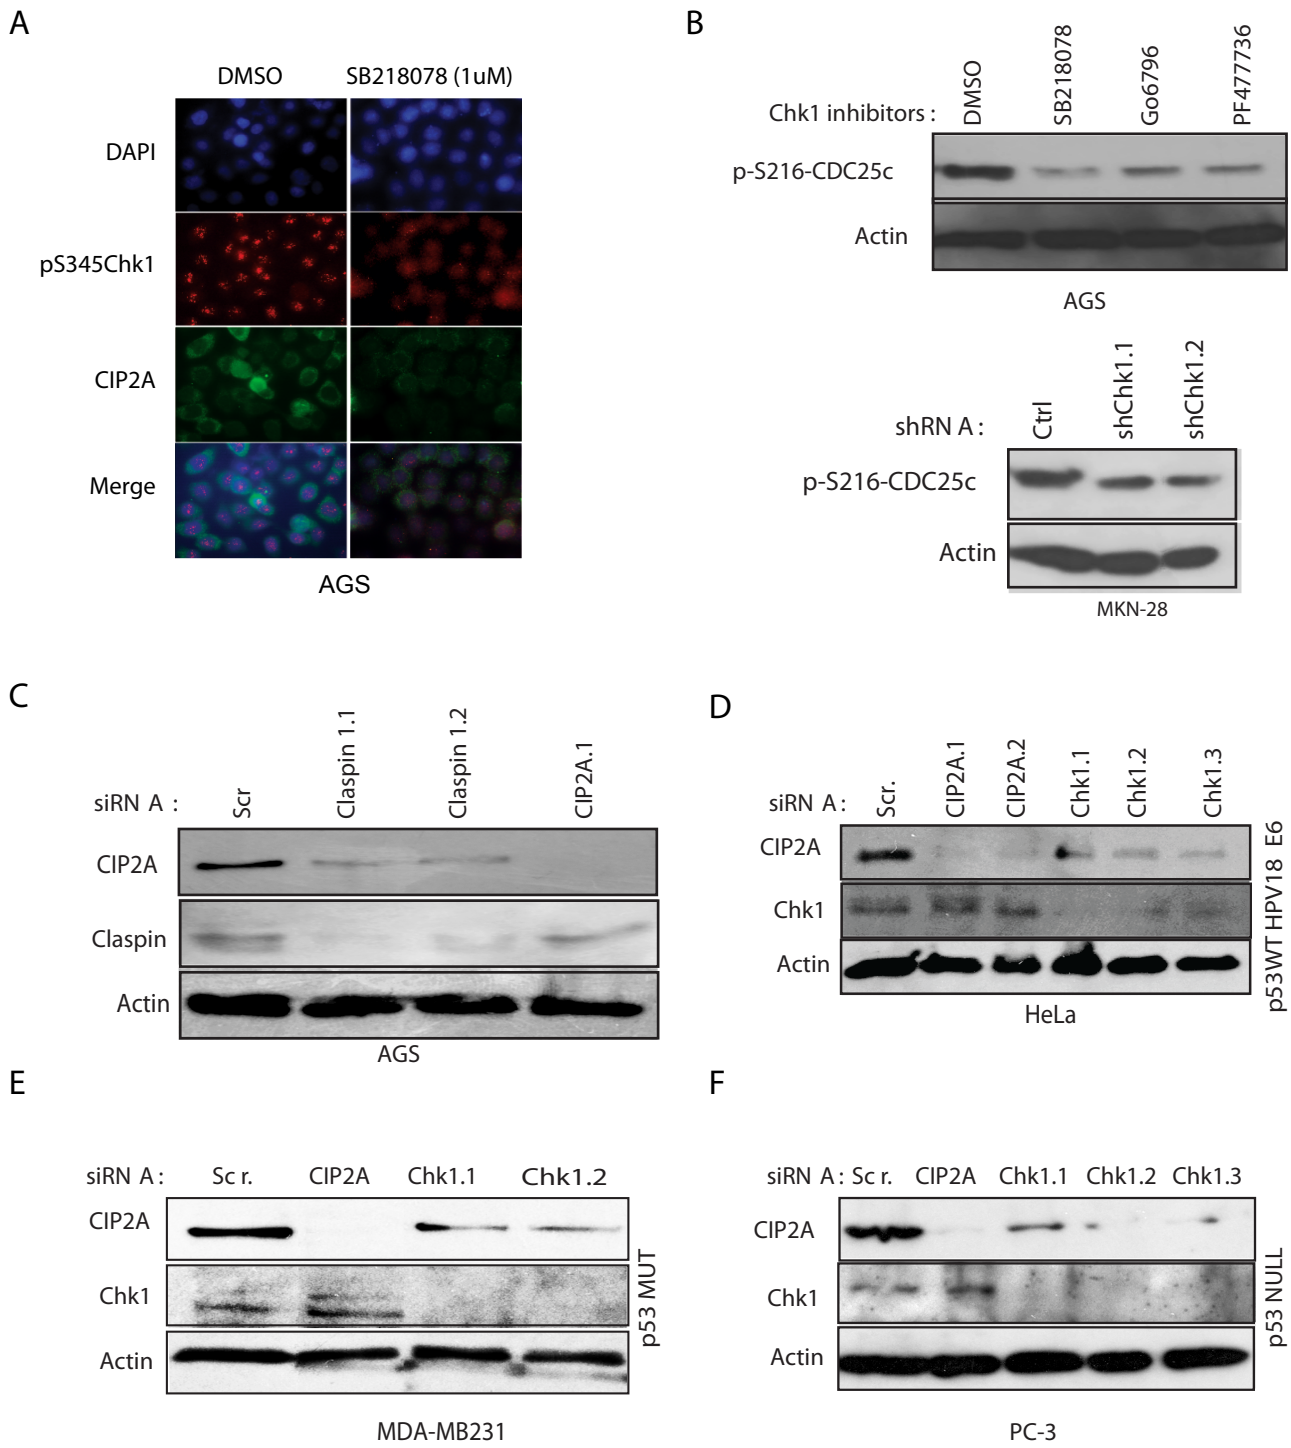

Figure S2

Supplement: NIHMS526074-supplement-3.pdf [file NIHMS526074-supplement-3.pdf]

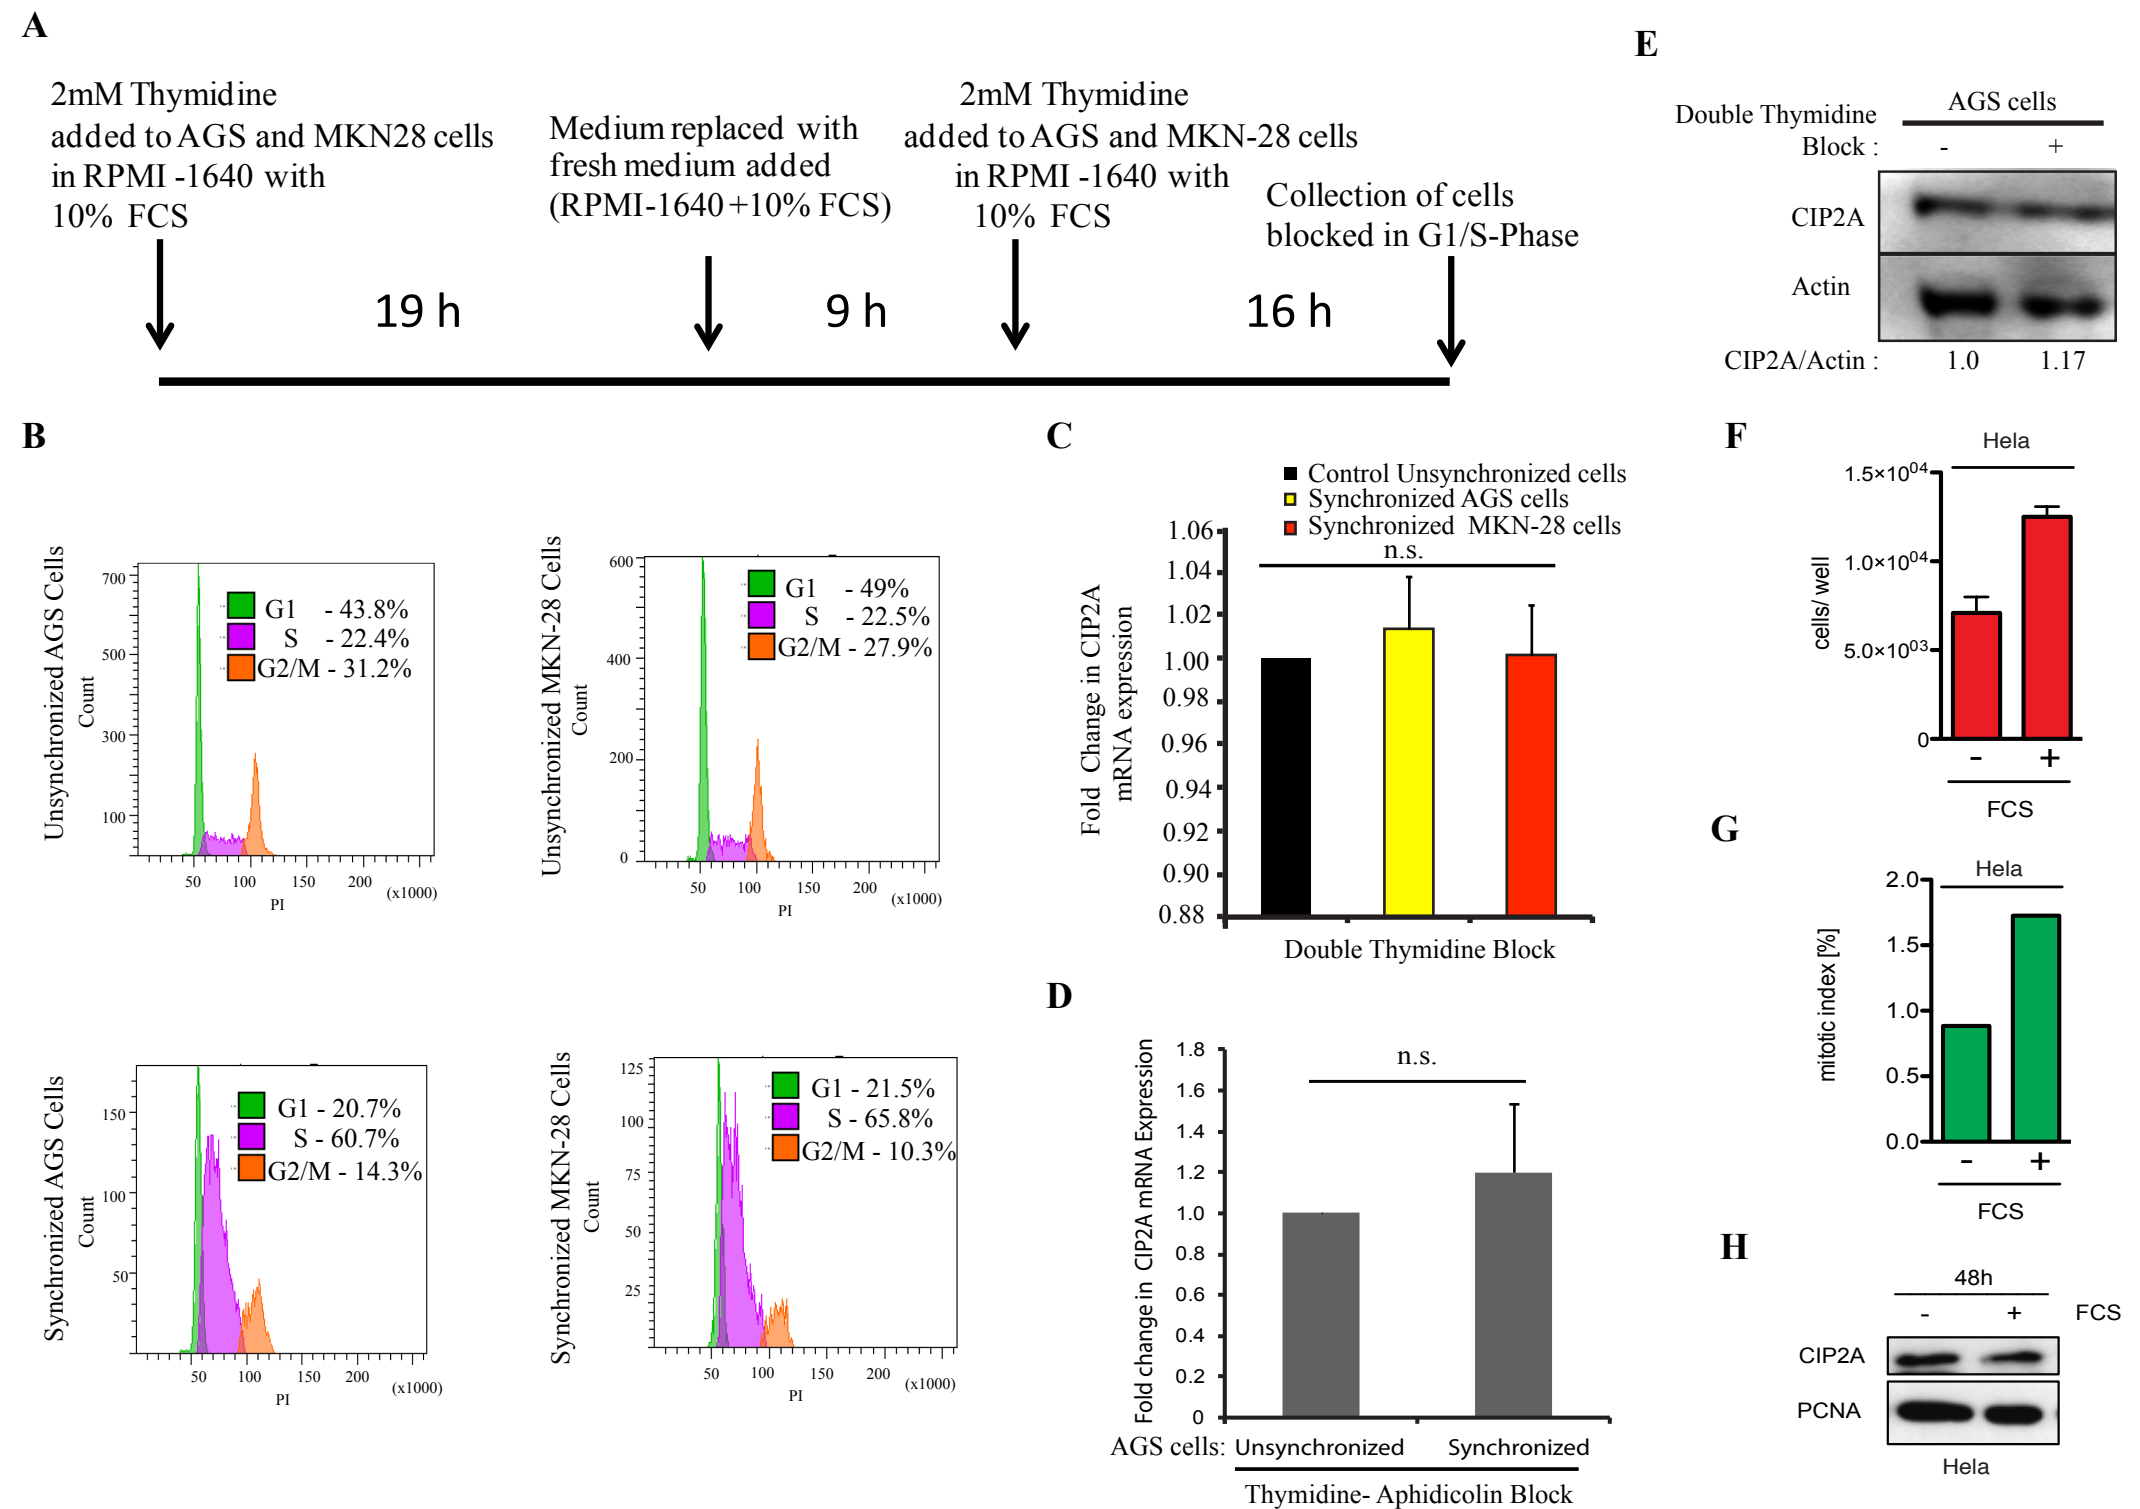

Figure S3

Supplement: NIHMS526074-supplement-4.pdf [file NIHMS526074-supplement-4.pdf]

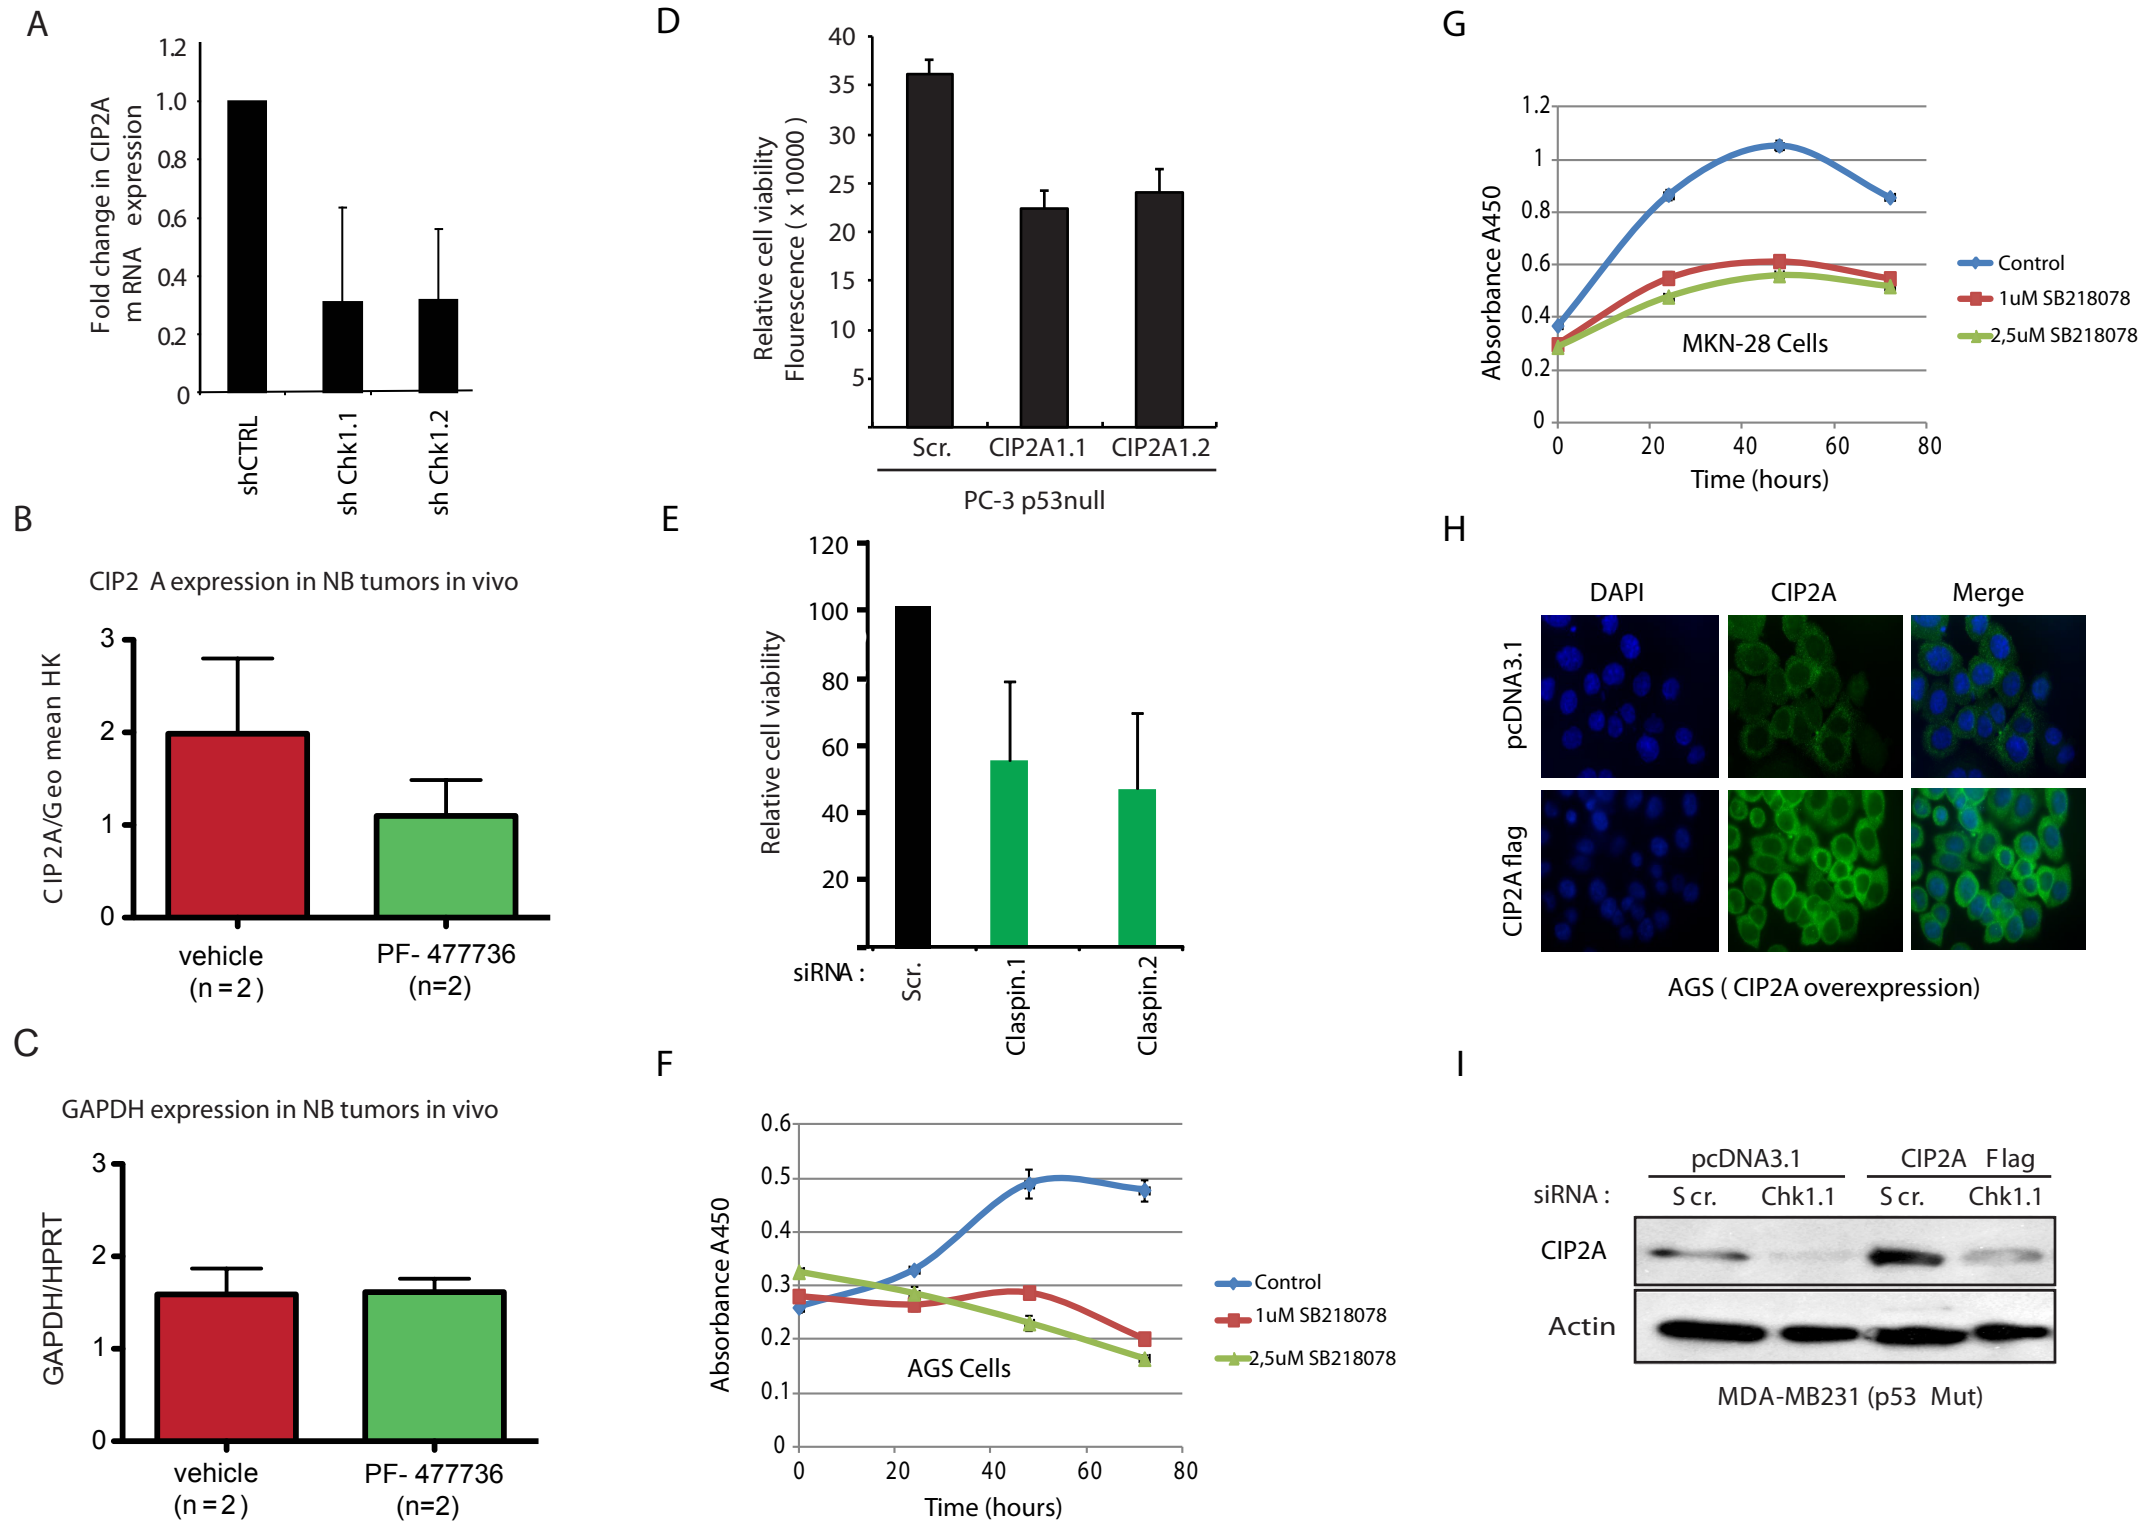

Figure S4

Supplement: NIHMS526074-supplement-5.pdf [file NIHMS526074-supplement-5.pdf]

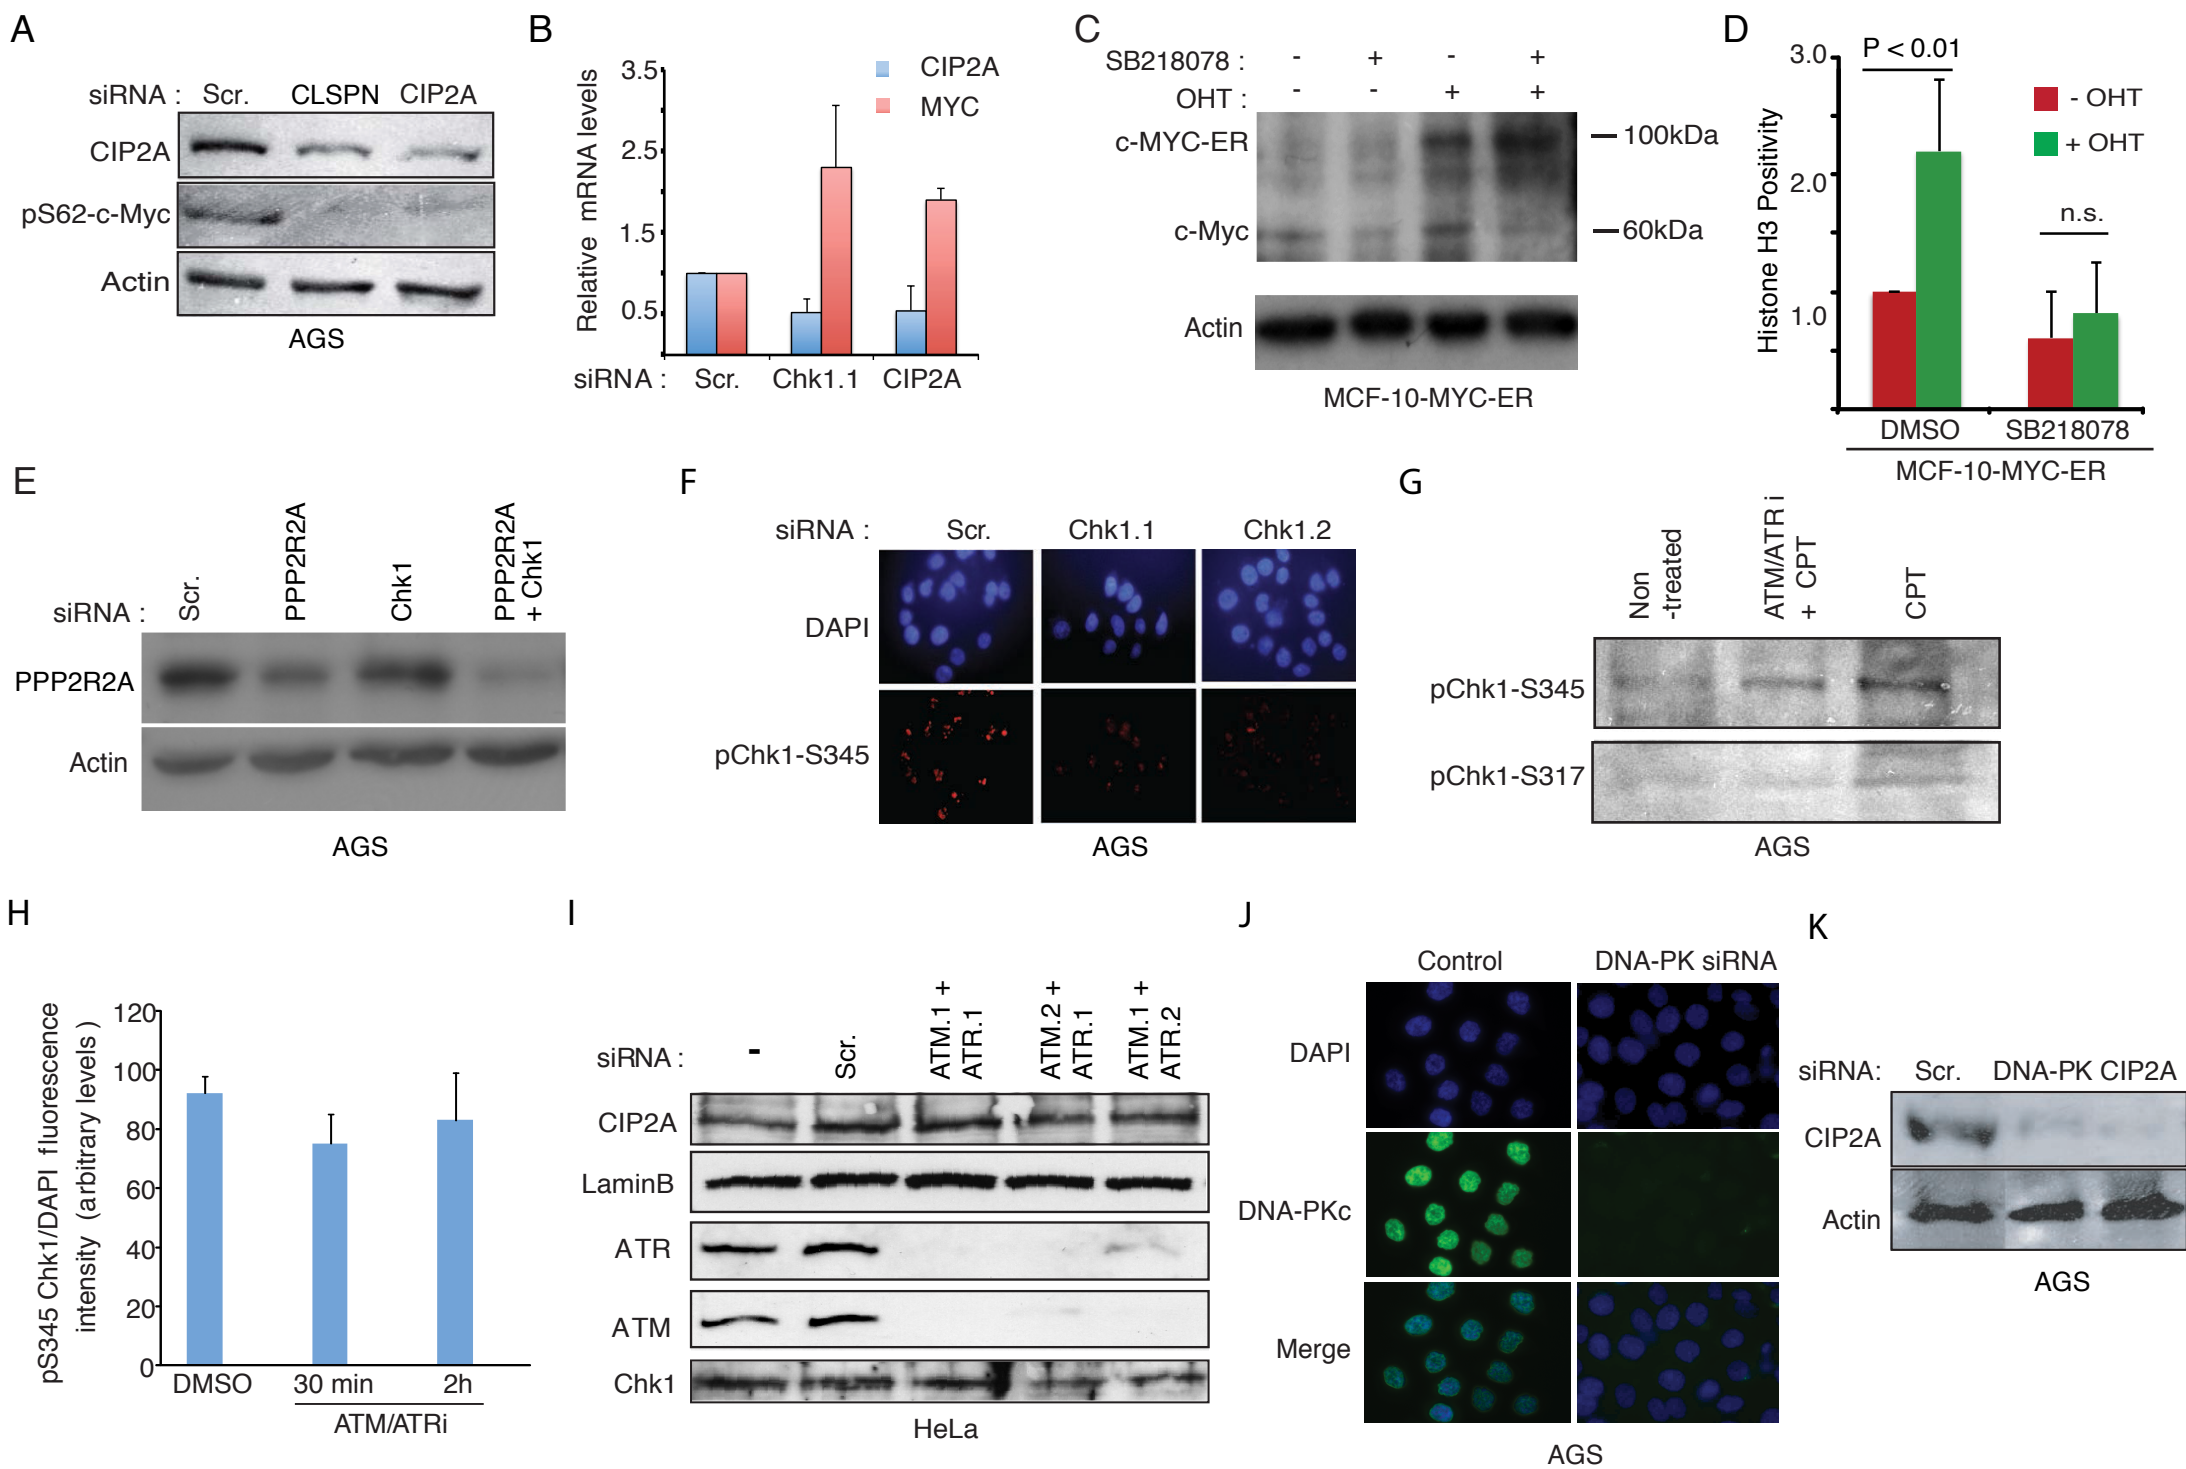

Figure S5

Supplement: NIHMS526074-supplement-6.pdf [file NIHMS526074-supplement-6.pdf]
